# Supplementary material for: Tailoring the selectivity in 2-butene conversion over supported d0 group 4, 5 and 6 metal hydrides: from dimerization to metathesis
Source: Royal Society of Chemistry journal article supplement (doi:10.1039/c5cy00582e), 2015-01-01
Supplement: c5cy00582e1.pdf [file c5cy00582e1.pdf]

# Tailoring the selectivity in 2-butene conversion over supported $d^0$ group 4, 5 and 6 metal hydrides: from dimerization to metathesis

*Kai C. Szeto\**, *Nicolas Merle*, *Cesar Rios*, *Pascal Rouge*, *Jessica Llop Castelbo*,  
*Mostafa Taoufik\**

*Université Lyon 1, ICL, CPE Lyon, CNRS, UMR 5265 C2P2, LCOMS, 43 Bd du 11 Novembre 1918 F-69616,  
Villeurbanne Cedex France.*

e-mail [Kai-Chung.SZETO@univ-lyon1.fr](mailto:Kai-Chung.SZETO@univ-lyon1.fr); [mostafa.taoufik@univ-lyon1.fr](mailto:mostafa.taoufik@univ-lyon1.fr)

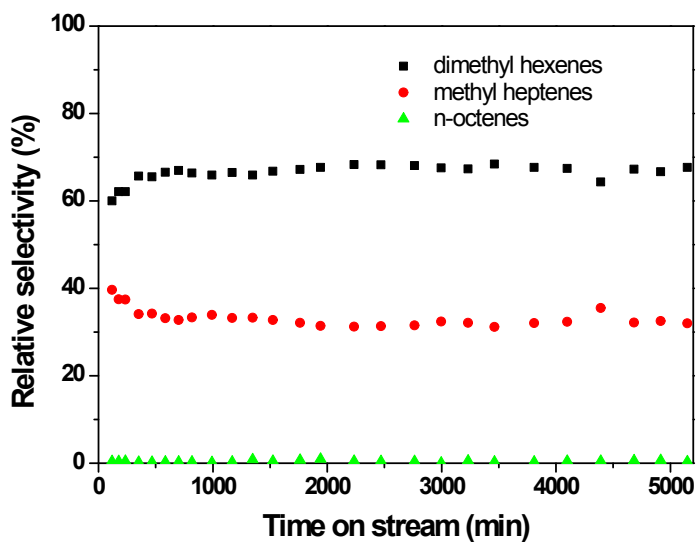

Figure S1. Relative selectivity of octenes with time on stream obtained during trans-2-butene dimerization over Zr-H/ SiO<sub>2</sub>-Al<sub>2</sub>O<sub>3</sub>-500°C at 180 °C and 20 bar.

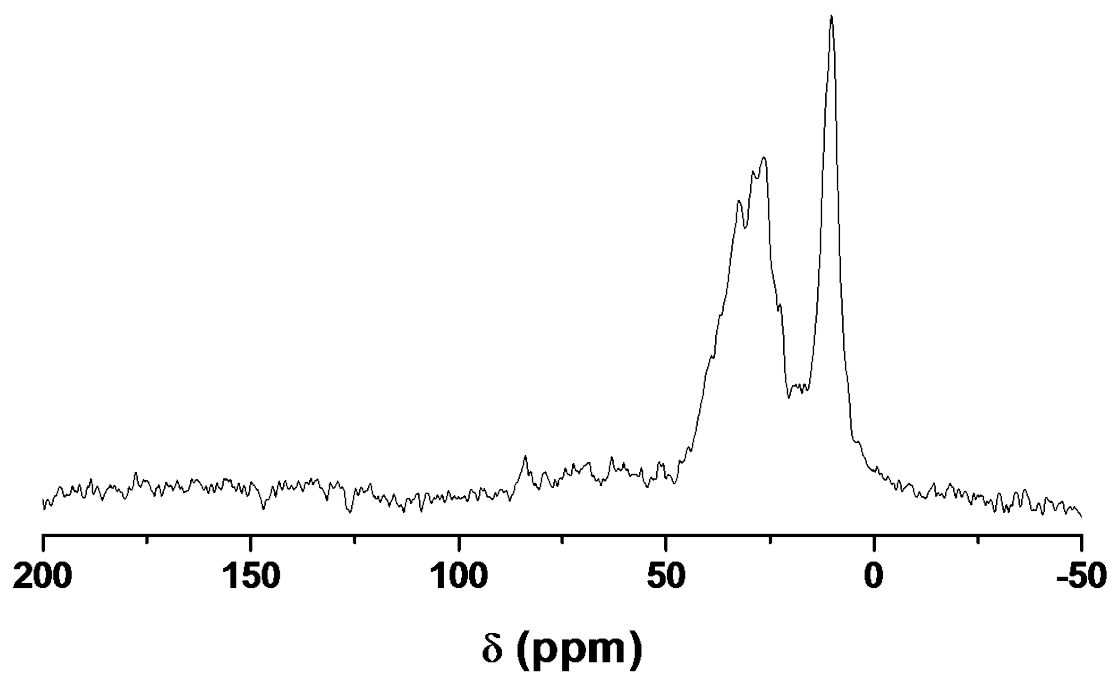

Figure S2.  $^{13}\text{C}$  CPMAS NMR spectrum of **1** after reaction with gas phase trans-2-butene at 180  $^{\circ}\text{C}$ .

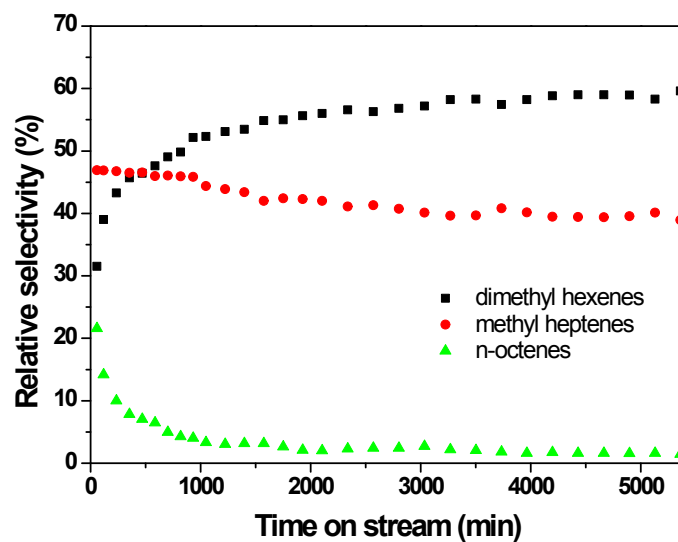

Figure S3. Relative selectivity of octenes with time on stream obtained during trans-2-butene conversion over Ta-H/ SiO<sub>2</sub>-Al<sub>2</sub>O<sub>3-500</sub>°C at 180 °C and 20 bar.

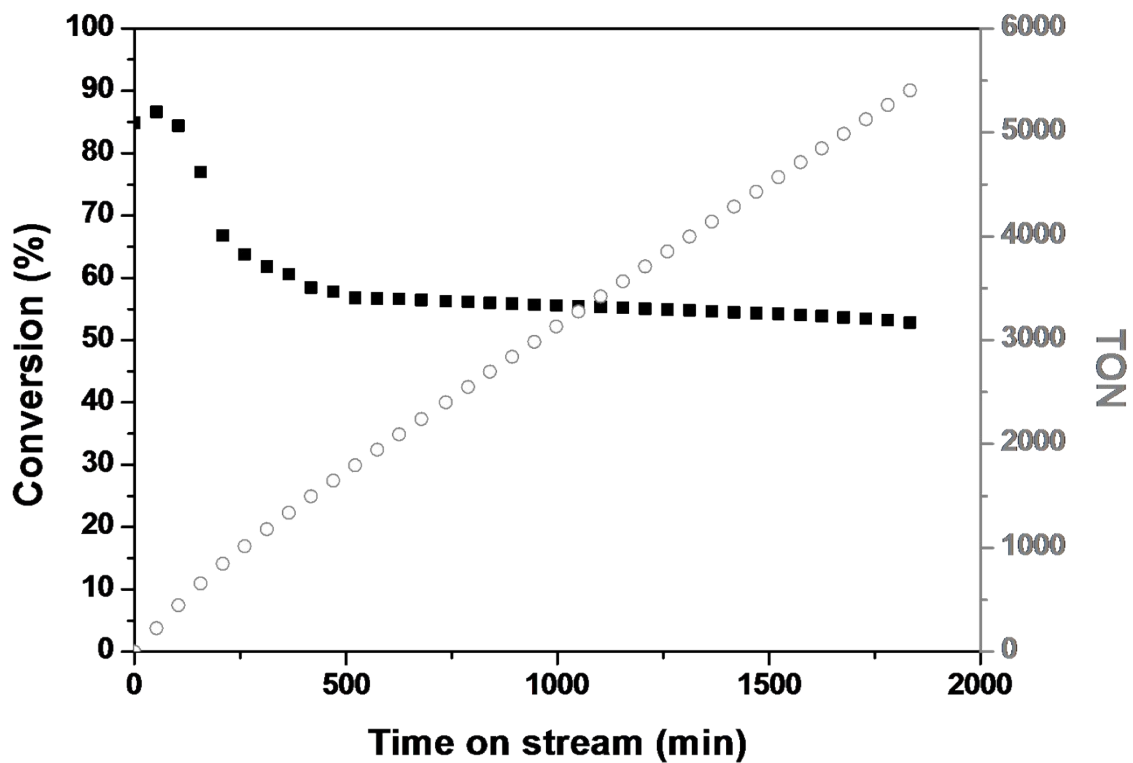

Figure S4. Conversion of 2-butenes and cumulated TON vs. time on stream over  $\text{WH}_3/\text{SiO}_2\text{-Al}_2\text{O}_{3-(500)}$ .

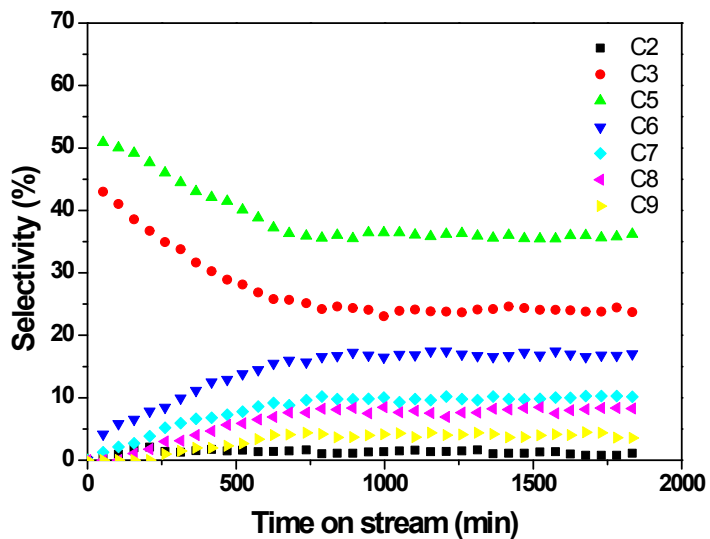

Figure S5. Selectivity vs. time on stream obtained during the 2-butenes conversion catalyzed by  $\text{WH}_3/\text{SiO}_2\text{-Al}_2\text{O}_3\text{-(500)}$ .
